# Supplementary material
Source: Springer Nature journal article supplement (https://www.springermedizin.de/resource/supplementary/12906_2014_2071_MOESM4_ESM.pdf/9523600)
Supplement: MOESM4 [file 9523600]

## Additional file 4: Supplemental figure 2

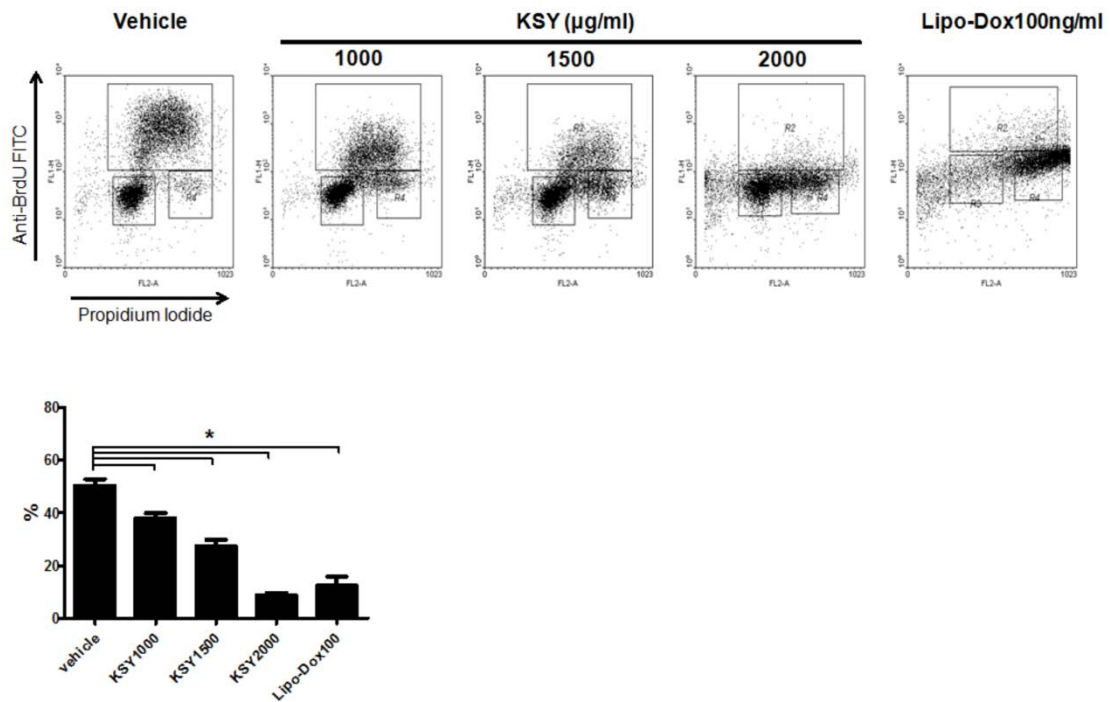

**Supplemental figure 2. KSY treatment reduces BrdU-positive cells and interferes with cell cycle progression.**

MBT-2 cells ( $1 \times 10^5$ ) were treated with different concentrations of KSY for 48 h, and then analyzed with BrdU/PI staining and flow cytometry. Representative FACS dot plots are shown in the upper panel, and DNA synthesis (S phase) was determined by quantifying the BrdU-positive cells in the dot plot. Quantification data of BrdU-positive cells are shown in the lower panel. \* indicates  $p < 0.05$  versus the vehicle group. Three independent experiments were performed.
